# Supplementary material for: The Dark Side of the Mushroom Spring Microbial Mat: Life in the Shadow of Chlorophototrophs. I. Microbial Diversity Based on 16S rRNA Gene Amplicons and Metagenomic Sequencing
Source: PubMed Central journal article supplement (PMC4911352; doi:10.3389/fmicb.2016.00919), 2016-06-17

**Figure S1(A)**

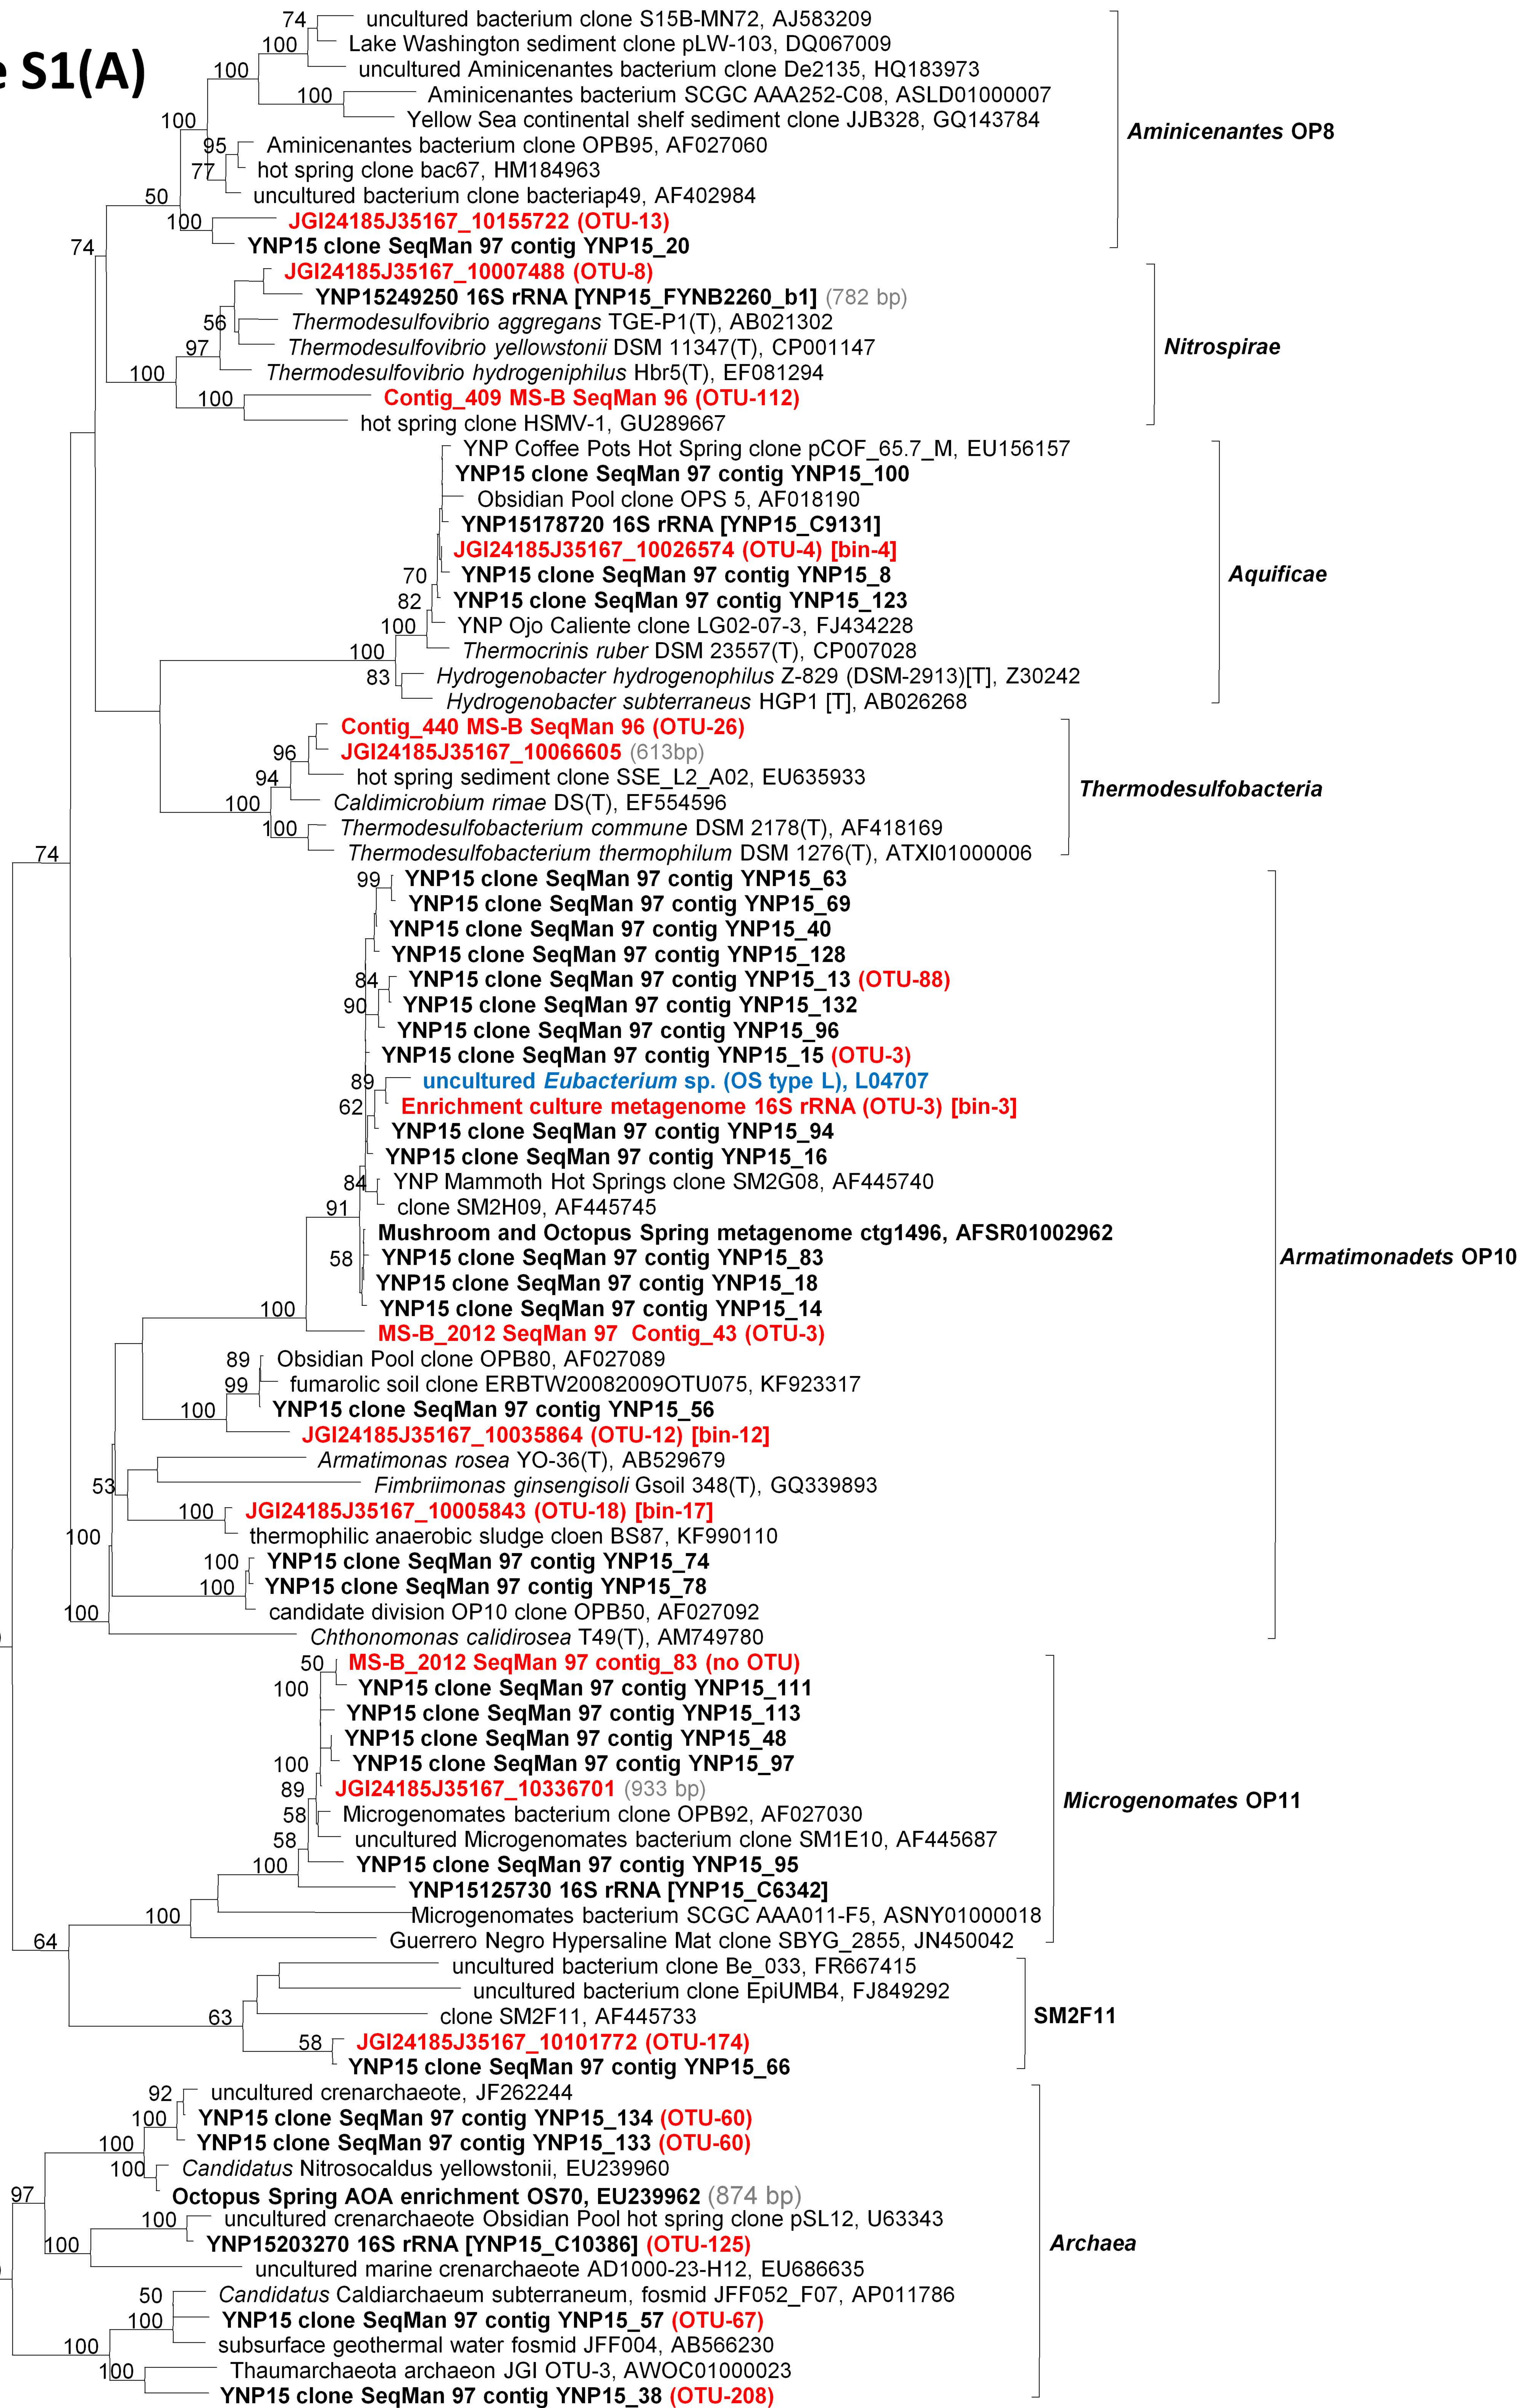



Figure S1(B)

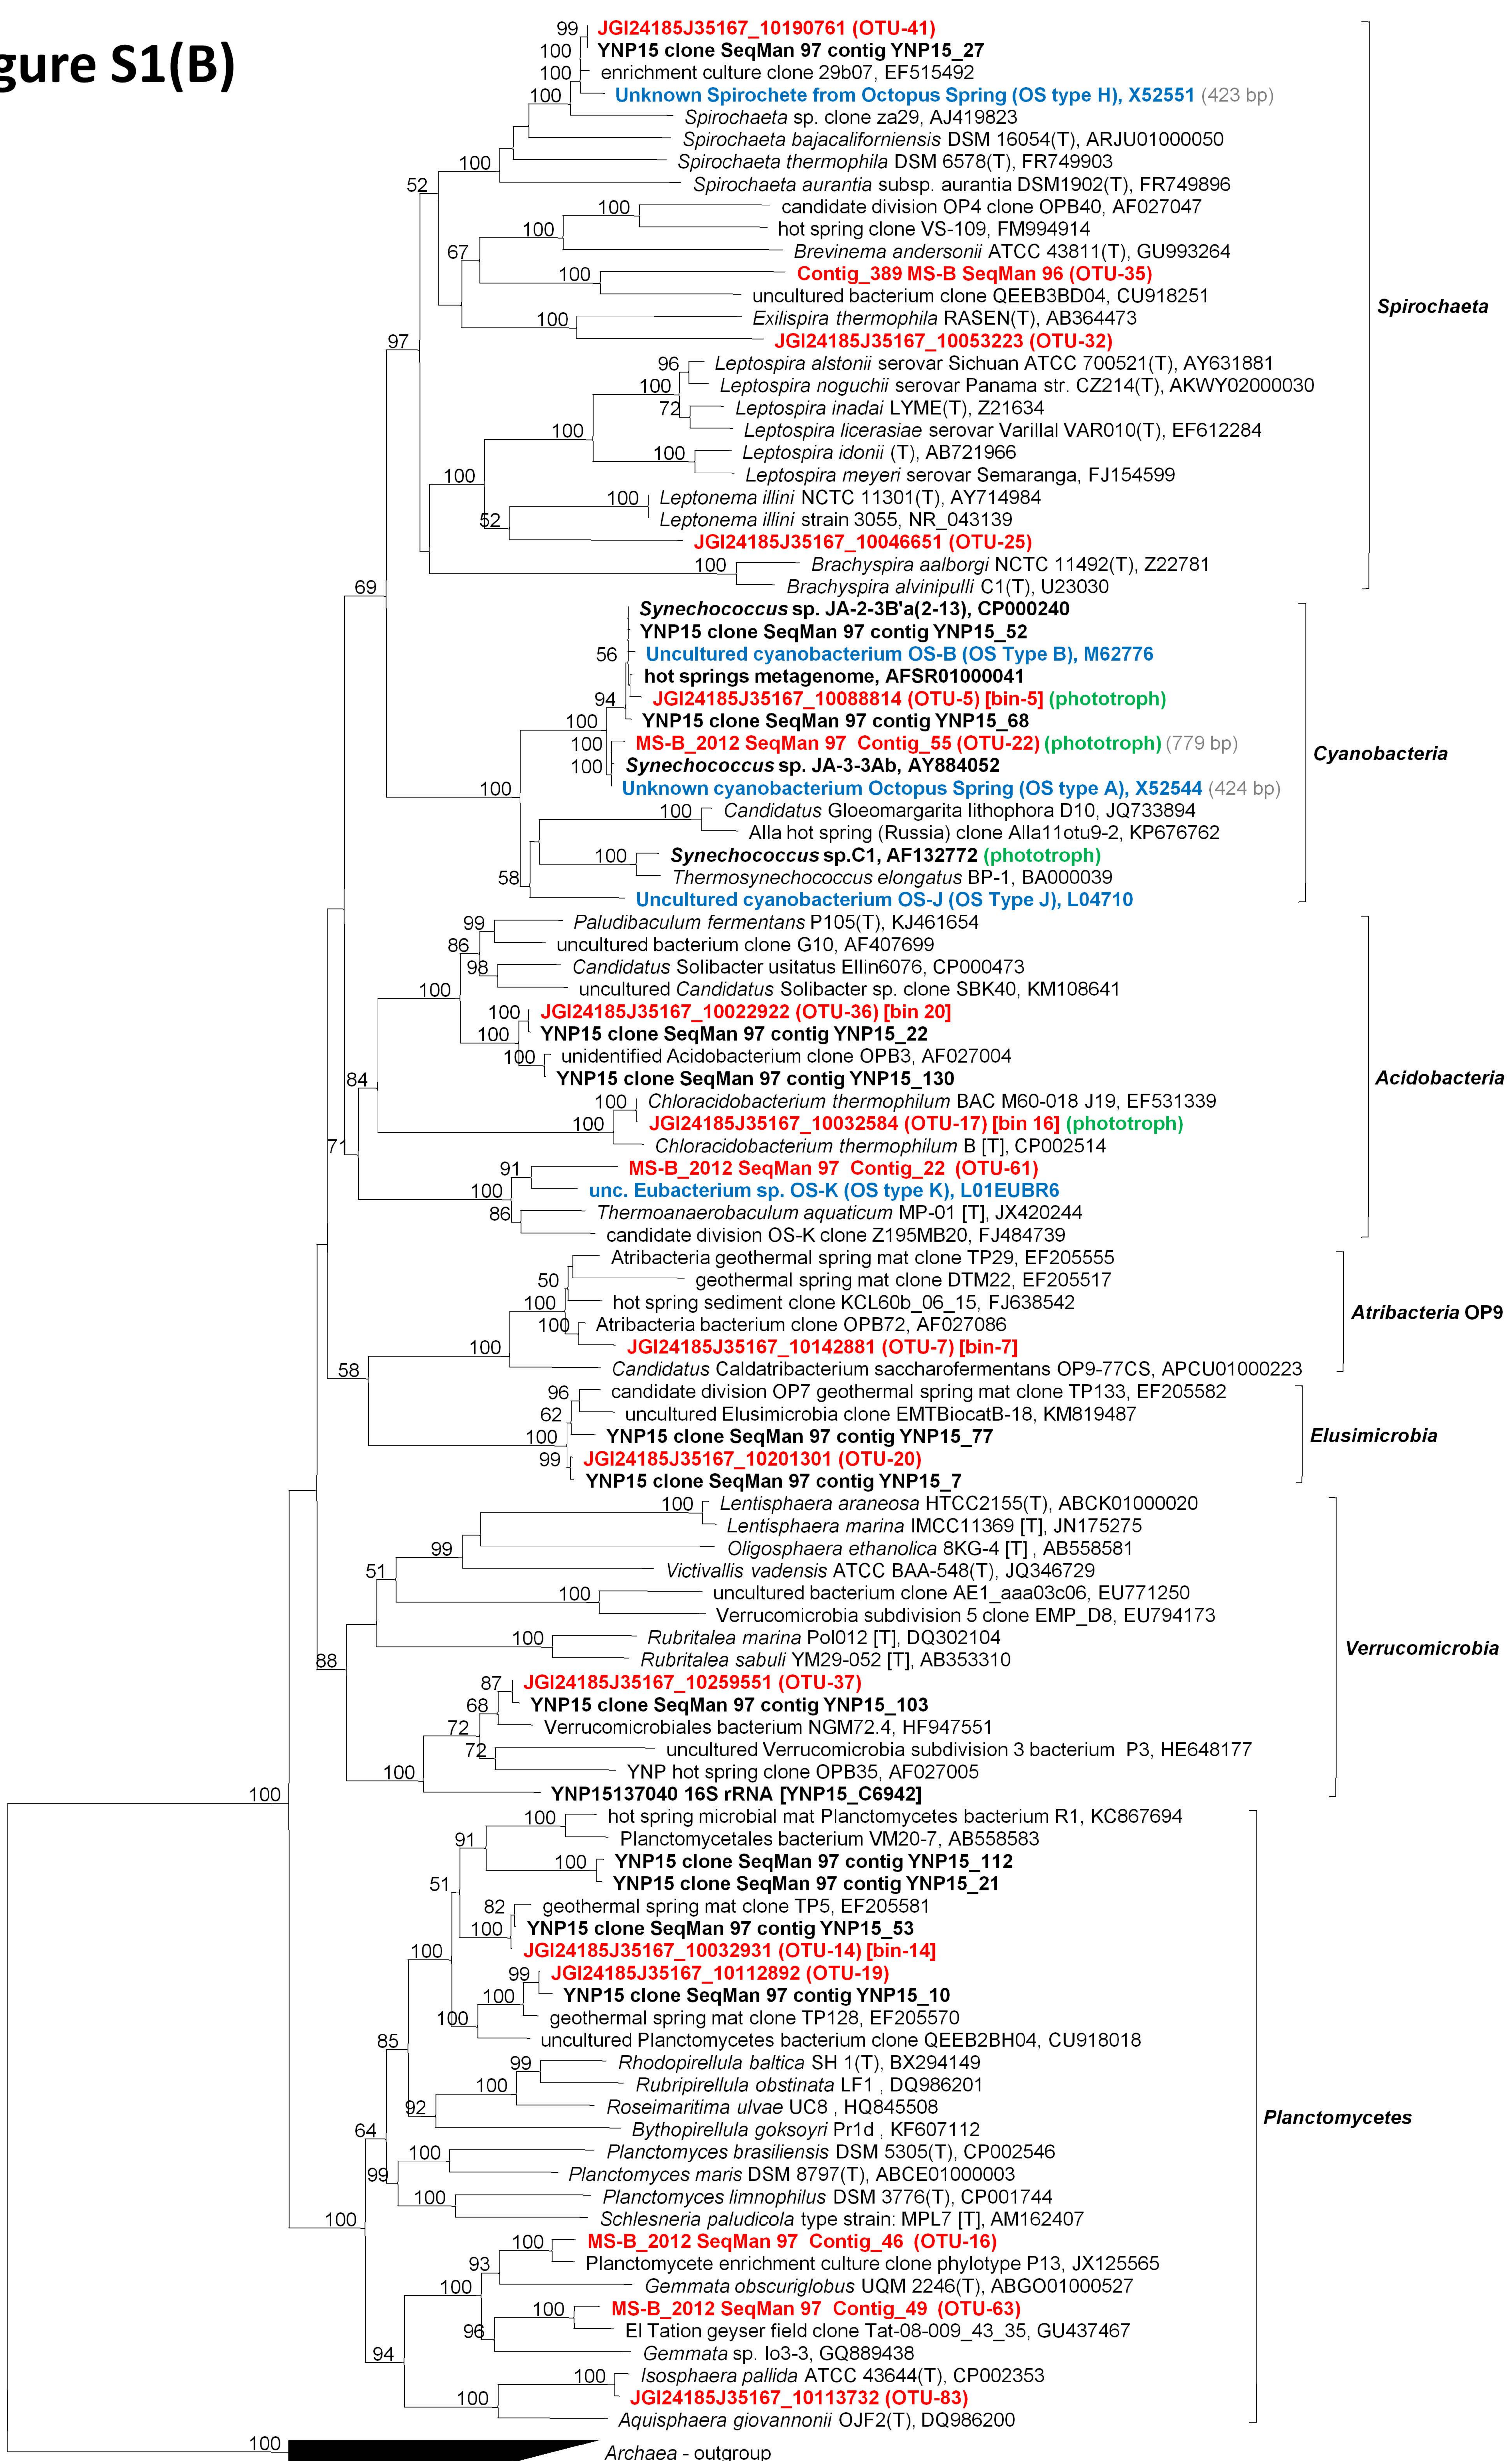



**Figure S1(C)**

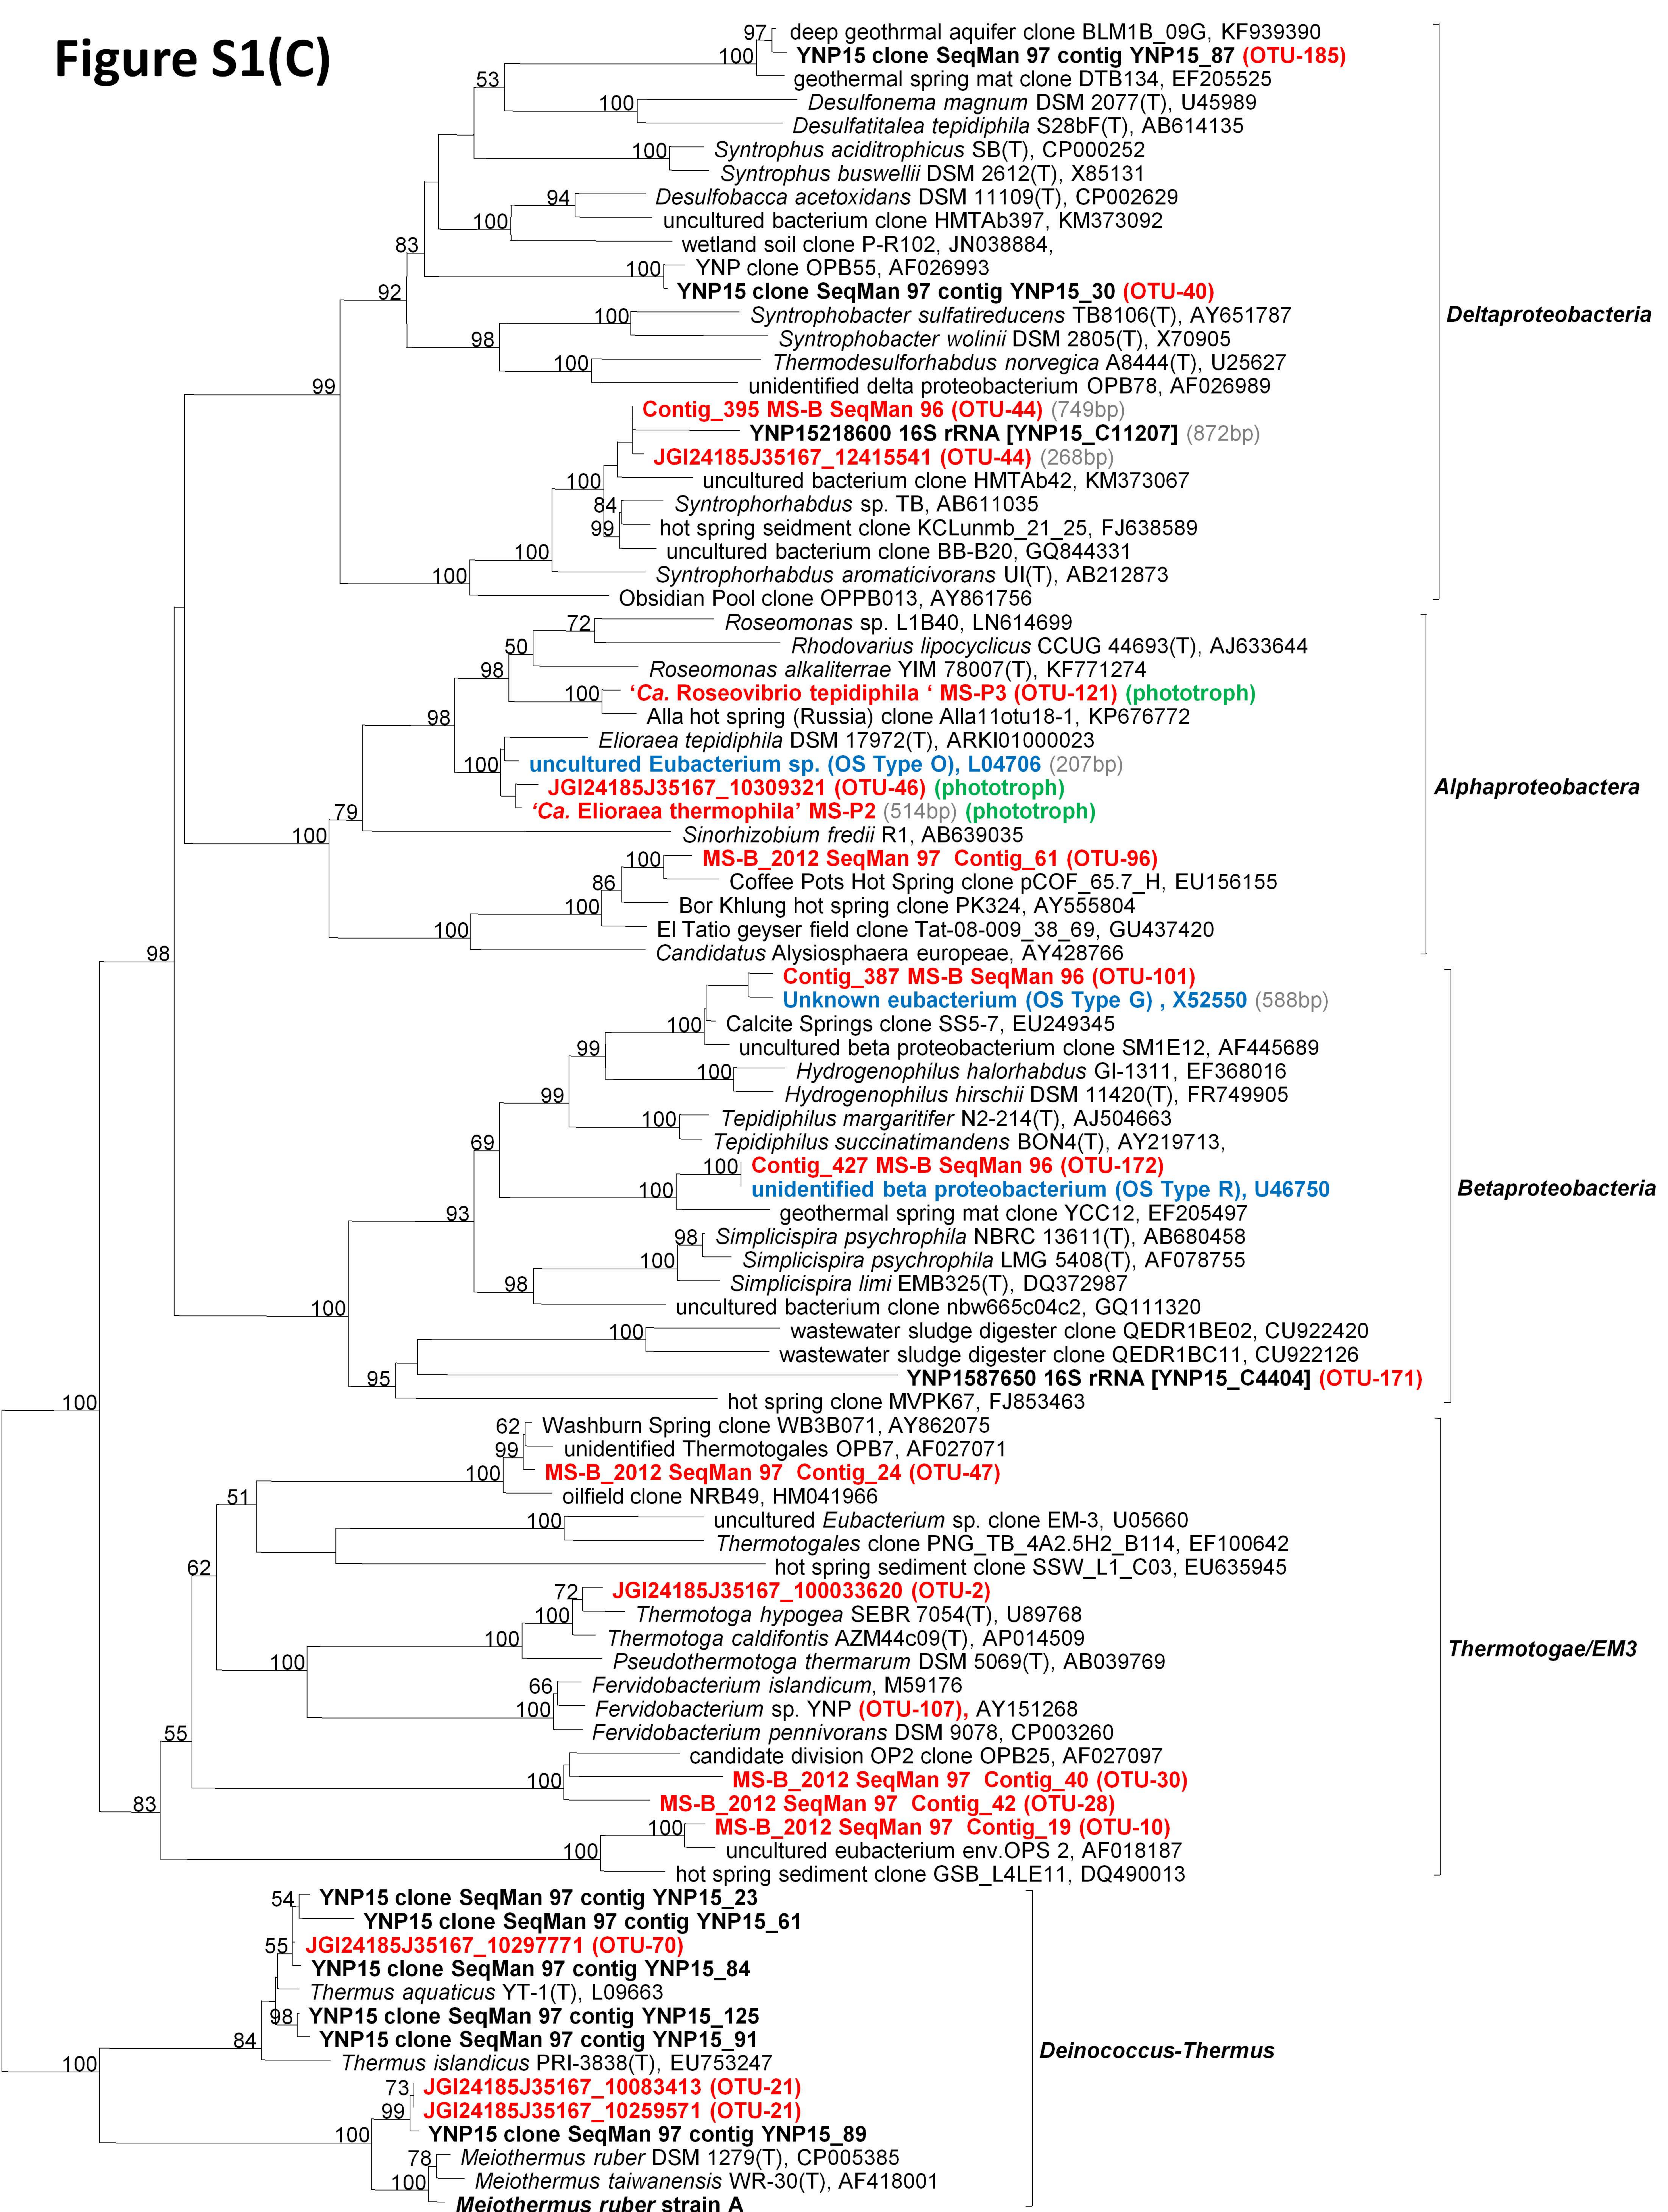

Supplement: Image1.pdf [file Image1.pdf]
